# Supplementary material for: The Natura 2000 network and the ranges of threatened species in Greece
Source: Springer Nature journal article supplement (doi:10.1007/s10531-021-02125-7), 2021-02-13
Supplement: MOESM1 [file 10531_2021_2125_MOESM1_ESM.docx]

**Journal: Biodiversity and Conservation**

**Title: The Natura 2000 network and the ranges of threatened species in Greece.**

**Authors: Konstantina Spiliopoulou1,2(**https://orcid.org/0000-0002-4636-4905**), Panayiotis G. Dimitrakopoulos3(**https://orcid.org/0000-0002-8374-4392**), Thomas M. Brooks4(**https://orcid.org/0000-0001-8159-3116**), Gabriela Kelaidi2, Kaloust Paragamian5(**https://orcid.org/0000-0001-7372-733X**), Vassiliki Kati6(**https://orcid.org/0000-0003-3357-4556**), Anthi Oikonomou1(**https://orcid.org/0000-0003-2537-8846**), Dimitris Vavylis2, Panayiotis Trigas7(**https://orcid.org/0000-0001-9557-7723**), Petros Lymberakis8(**https://orcid.org/0000-0002-5067-9600**), William Darwall9(**https://orcid.org/0000-0002-4589-5579**), Maria Th. Stoumboudi1 & Kostas A. Triantis2 (**https://orcid.org/0000-0003-2737-8890**)**

**Affiliations:**

1 Hellenic Centre for Marine Research, Institute of Marine Biological Resources and Inland Waters, 19013 Anavissos, Greece

2 Department of Ecology and Taxonomy, Faculty of Biology, National and Kapodistrian University of Athens, GR-15784 Athens, Greece

3 Biodiversity Conservation Laboratory, Department of Environment, University of the Aegean, 81100 Mytilene, Greece

4 Science and Knowledge Unit, International Union for Conservation of Nature (IUCN), CH-1196 Gland, Switzerland

5 Hellenic Institute of Speleological Research, 714 09 Irakleio, Crete, Greece

6 Department of Biological Applications and Technology, University of Ioannina, 45110 Ioannina, Greece

7 Faculty of Crop Science, Agricultural University of Athens, GR-118 55 Athens, Greece

8 Natural History Museum of Crete, University of Crete, 71409 Irakleio, Greece

9 Freshwater Biodiversity Unit, IUCN Global Species Programme, The David Attenborough Building, CB2 3QZ UK Cambridge, United Kingdom

**Correspondence: Konstantina Spiliopoulou (**[k.spilio@hcmr.gr](mailto:k.spilio@hcmr.gr)**) & Kostas A. Triantis (**[ktriantis@biol.uoa.gr](mailto:ktriantis@biol.uoa.gr)**)**

Table S1 The mean and median percentage (%) overlap of the Natura 2000 network, the Special Protection
Areas (SPAs) sites and the Special Areas of Conservation (SACs) sites separately for all threatened species,
each group/class, IUCN Red List threat category and systems.

| ***Class/Group*** | **Mean** | | | **Median** | | |
| --- | --- | --- | --- | --- | --- | --- |
| **Natura 2000 (%)** | **SPAs (%)** | **SACs (%)** | **Natura 2000 (%)** | **SPAs (%)** | **SACs (%)** |
| All species | 47.6 | 33.4 | 38.1 | 39.5 | 22.9 | 22.4 |
| Bivalvia | 65.7 | 61.9 | 58.9 | 65.7 | 61.9 | 58.9 |
| Magnoliopsida | 58.4 | 34.9 | 51.8 | 36.4 | 23.9 | 22.1 |
| Actinopterygii | 51.3 | 40.7 | 41.4 | 32.6 | 20.2 | 21.8 |
| Gastropoda | 48.8 | 37.2 | 39.1 | 39.8 | 20.2 | 17.2 |
| Reptilia | 46.1 | 34.0 | 38.6 | 40.7 | 28.4 | 34.2 |
| Polypodiopsida | 45.3 | 12.6 | 40.4 | 31.2 | 11.5 | 21.6 |
| Insecta | 41.2 | 26.9 | 30.3 | 36.4 | 23.9 | 22.1 |
| Amphibia | 41.1 | 13.9 | 39.1 | 18.3 | 13.8 | 18.3 |
| Mammalia | 39.8 | 28.4 | 27.3 | 30.6 | 27.5 | 16.3 |
| Aves | 29.3 | 18.3 | 22.4 | 29.8 | 14.7 | 26.4 |
| Malacostraca | 28.8 | 23.3 | 17.0 | 28.8 | 23.3 | 17.0 |
| Agaricomycetes | 24.2 | 19.5 | 14.4 | 24.2 | 19.5 | 14.4 |
| Cephalaspidomorphi | 23.9 | 21.7 | 11.1 | 23.9 | 21.7 | 11.1 |
| Lycopodiopsida | 22.3 | 6.0 | 20.4 | 22.3 | 6.0 | 20.4 |
| VU | 47.1 | 32.2 | 37.6 | 39.1 | 24.9 | 22.1 |
| EN | 46.5 | 34.2 | 37.0 | 39.0 | 23.4 | 23.3 |
| CR | 51.2 | 36.1 | 42.6 | 41.2 | 19.4 | 24.9 |
| Terrestrial species | 47.7 | 31.6 | 38.3 | 41.2 | 23.1 | 25.6 |
| Freshwater species | 46.0 | 38.3 | 36.4 | 31.3 | 21.6 | 18.7 |

Table S2 The threatened species, Class, id, threat category and system as provided by the IUCN Red List of Threatened Species, and their mean percentage (%) coverage by the Natura 2000 network and the individual Natura 2000 site types, SPAs and SCAs. Note that the Class Liliopsida is considered under the Class Magnoliopsida in the main text.

| **Scientific Name** | **Class** | **ID** | **Threat Category** | **System** | **Natura 2000 (%)** | **SPAs (%)** | **SCAs (%)** |
| --- | --- | --- | --- | --- | --- | --- | --- |
| *Acicula multilineata* | Gastropoda | 156661 | Vulnerable | Terrestrial | 11.0 | 11.0 | 6.8 |
| *Aesculus hippocastanum* | Magnoliopsida | 202914 | Vulnerable | Terrestrial | 46.9 | 36.2 | 30.4 |
| *Aethionema retsina* | Magnoliopsida | 61628 | Critically Endangered | Terrestrial | 79.0 | 79.0 | 45.0 |
| *Albinaria adrianae* | Gastropoda | 171770 | Vulnerable | Terrestrial | 36.6 | 36.6 | 13.1 |
| *Albinaria adriani* | Gastropoda | 171435 | Vulnerable | Terrestrial | 10.2 | 0.0 | 10.2 |
| *Albinaria ariadne* | Gastropoda | 171517 | Vulnerable | Terrestrial | 0.0 | 0.0 | 0.0 |
| *Albinaria christae* | Gastropoda | 171725 | Vulnerable | Terrestrial | 0.0 | 0.0 | 0.0 |
| *Albinaria compressa* | Gastropoda | 171525 | Vulnerable | Terrestrial | 18.7 | 18.7 | 0.0 |
| *Albinaria cytherae* | Gastropoda | 171616 | Vulnerable | Terrestrial | 22.4 | 22.3 | 4.5 |
| *Albinaria evelynae* | Gastropoda | 171504 | Vulnerable | Terrestrial | 0.0 | 0.0 | 0.0 |
| *Albinaria fuchskaeufeli* | Gastropoda | 171680 | Vulnerable | Terrestrial | 100.0 | 100.0 | 100.0 |
| *Albinaria haessleini* | Gastropoda | 171193 | Vulnerable | Terrestrial | 37.5 | 34.0 | 15.3 |
| *Albinaria idyllica* | Gastropoda | 171643 | Vulnerable | Terrestrial | 51.1 | 0.0 | 51.1 |
| *Albinaria ithomensis* | Gastropoda | 171777 | Vulnerable | Terrestrial | 0.0 | 0.0 | 0.0 |
| *Albinaria jaeckeli* | Gastropoda | 171723 | Vulnerable | Terrestrial | 98.4 | 98.4 | 98.4 |
| *Albinaria janicollis* | Gastropoda | 171423 | Vulnerable | Terrestrial | 100.0 | 100.0 | 100.0 |

| **Scientific Name** | **Class** | **ID** | **Threat Category** | **System** | **Natura 2000 (%)** | **SPAs (%)** | **SCAs (%)** |
| --- | --- | --- | --- | --- | --- | --- | --- |
| *Albinaria janisadana* | Gastropoda | 171431 | Vulnerable | Terrestrial | 100.0 | 100.0 | 100.0 |
| *Albinaria klemmi* | Gastropoda | 170955 | Vulnerable | Terrestrial | 71.2 | 71.2 | 4.9 |
| *Albinaria li* | Gastropoda | 171719 | Vulnerable | Terrestrial | 100.0 | 100.0 | 100.0 |
| *Albinaria linnei* | Gastropoda | 172013 | Vulnerable | Terrestrial | 0.0 | 0.0 | 0.0 |
| *Albinaria litoraria* | Gastropoda | 171039 | Vulnerable | Terrestrial | 0.0 | 0.0 | 0.0 |
| *Albinaria moreletiana* | Gastropoda | 171197 | Vulnerable | Terrestrial | 0.0 | 0.0 | 0.0 |
| *Albinaria pelocarinata* | Gastropoda | 171563 | Vulnerable | Terrestrial | 0.0 | 0.0 | 0.0 |
| *Albinaria rebeli* | Gastropoda | 171196 | Vulnerable | Terrestrial | 57.4 | 0.0 | 57.4 |
| *Albinaria rechingeri* | Gastropoda | 171775 | Critically Endangered | Terrestrial | 98.0 | 98.0 | 0.0 |
| *Albinaria retusa* | Gastropoda | 171538 | Critically Endangered | Terrestrial | 99.2 | 99.2 | 99.2 |
| *Albinaria solicola* | Gastropoda | 170987 | Vulnerable | Terrestrial | 9.8 | 0.0 | 9.8 |
| *Albinaria sphakiota* | Gastropoda | 171543 | Vulnerable | Terrestrial | 100.0 | 76.7 | 100.0 |
| *Albinaria sturanyi* | Gastropoda | 171425 | Vulnerable | Terrestrial | 100.0 | 100.0 | 100.0 |
| *Albinaria subaii* | Gastropoda | 171229 | Vulnerable | Terrestrial | 99.8 | 99.8 | 0.0 |
| *Albinaria sublamellosa* | Gastropoda | 171141 | Vulnerable | Terrestrial | 100.0 | 28.7 | 100.0 |
| *Albinaria thiesseae* | Gastropoda | 171354 | Vulnerable | Terrestrial | 21.5 | 12.0 | 19.8 |
| *Albinaria torticollis* | Gastropoda | 171101 | Endangered | Terrestrial | 98.2 | 98.2 | 98.2 |
| *Albinaria ulrikae* | Gastropoda | 171362 | Vulnerable | Terrestrial | 0.0 | 0.0 | 0.0 |
| *Albinaria vrondamasa* | Gastropoda | 170870 | Vulnerable | Terrestrial | 1.5 | 0.0 | 1.5 |
| **Scientific Name** | **Class** | **ID** | **Threat Category** | **System** | **Natura 2000 (%)** | **SPAs (%)** | **SCAs (%)** |
| *Albinaria wettsteini* | Gastropoda | 171741 | Vulnerable | Terrestrial | 100.0 | 100.0 | 100.0 |
| *Albinaria wiesei* | Gastropoda | 171324 | Vulnerable | Terrestrial | 3.3 | 3.3 | 0.0 |
| *Albinaria xanthostoma* | Gastropoda | 171654 | Vulnerable | Terrestrial | 68.0 | 24.9 | 68.0 |
| *Albinaria zilchi* | Gastropoda | 170965 | Vulnerable | Terrestrial | 0.0 | 0.0 | 0.0 |
| *Alburnoides prespensis* | Actinopterygii | 135527 | Vulnerable | Freshwater | 100.0 | 100.0 | 100.0 |
| *Alburnus belvica* | Actinopterygii | 61391 | Vulnerable | Freshwater | 100.0 | 100.0 | 100.0 |
| *Alburnus macedonicus* | Actinopterygii | 135620 | Critically Endangered | Freshwater | 91.6 | 91.6 | 29.6 |
| *Alburnus vistonicus* | Actinopterygii | 135503 | Critically Endangered | Freshwater | 28.4 | 22.8 | 15.1 |
| *Alburnus volviticus* | Actinopterygii | 135641 | Endangered | Freshwater | 75.0 | 74.9 | 15.5 |
| *Aldrovanda vesiculosa* | Magnoliopsida | 162346 | Endangered | Freshwater | 26.0 | 23.8 | 19.9 |
| *Allaegopis subariedeli* | Gastropoda | 171121 | Vulnerable | Terrestrial | 60.0 | 60.0 | 6.3 |
| *Allium iatrouinum* | Liliopsida | 112444938 | Critically Endangered | Terrestrial | 100.0 | 100.0 | 100.0 |
| *Allium makrianum* | Liliopsida | 13144560 | Endangered | Terrestrial | 66.0 | 66.0 | 66.0 |
| *Allium pycnotrichum* | Liliopsida | 112445826 | Endangered | Terrestrial | 100.0 | 0.0 | 100.0 |
| *Alosa macedonica* | Actinopterygii | 905 | Vulnerable | Freshwater | 100.0 | 100.0 | 91.3 |
| *Alosa vistonica* | Actinopterygii | 61393 | Critically Endangered | Freshwater | 100.0 | 99.2 | 100.0 |
| *Ammobates melectoides* | Insecta | 48635233 | Endangered | Terrestrial | 23.7 | 16.1 | 16.8 |
| *Ampedus hjorti* | Insecta | 157692 | Vulnerable | Terrestrial | 26.9 | 21.5 | 15.8 |
| *Anacamptis boryi* | Liliopsida | 175958 | Vulnerable | Terrestrial | 26.4 | 20.5 | 15.8 |
| **Scientific Name** | **Class** | **ID** | **Threat Category** | **System** | **Natura 2000 (%)** | **SPAs (%)** | **SCAs (%)** |
| *Anadrymadusa brevipennis* | Insecta | 64529440 | Vulnerable | Terrestrial | 29.5 | 22.6 | 18.3 |
| *Anaglyptus luteofasciatus* | Insecta | 157814 | Endangered | Terrestrial | 58.3 | 37.0 | 47.3 |
| *Anaglyptus praecellens* | Insecta | 157893 | Endangered | Terrestrial | 99.8 | 8.6 | 99.8 |
| *Andreiniimon nuptialis* | Insecta | 44710118 | Vulnerable | Terrestrial | 45.8 | 39.7 | 35.6 |
| *Androcymbium rechingeri* | Liliopsida | 162302 | Endangered | Terrestrial | 45.8 | 29.4 | 29.2 |
| *Anguilla anguilla* | Actinopterygii | 60344 | Critically Endangered | Freshwater | Marine | 26.1 | 20.2 | 15.8 |
| *Anthemis glaberrima* | Magnoliopsida | 61617 | Critically Endangered | Terrestrial | 100.0 | 100.0 | 100.0 |
| *Aphanius almiriensis* | Actinopterygii | 135600 | Critically Endangered | Freshwater | 32.3 | 13.8 | 28.6 |
| *Arum purpureospathum* | Liliopsida | 165199 | Vulnerable | Terrestrial | 100.0 | 33.0 | 100.0 |
| *Asiotmethis limbatus* | Insecta | 64547977 | Vulnerable | Terrestrial | 32.4 | 27.8 | 16.4 |
| *Asplenium aegaeum* | Polypodiopsida | 83467644 | Vulnerable | Terrestrial | 79.5 | 2.4 | 79.5 |
| *Asplenium creticum* | Polypodiopsida | 83470616 | Vulnerable | Terrestrial | 25.2 | 11.5 | 21.6 |
| *Assyriella rechingeri* | Gastropoda | 156656 | Critically Endangered | Terrestrial | 41.1 | 12.7 | 41.1 |
| *Astacus astacus* | Malacostraca | 2191 | Vulnerable | Freshwater | 26.2 | 21.1 | 15.2 |
| *Asyneuma giganteum* | Magnoliopsida | 162027 | Vulnerable | Terrestrial | 54.5 | 26.1 | 49.2 |
| *Atyaephyra strymonensis* | Malacostraca | 42428291 | Vulnerable | Freshwater | 31.4 | 25.6 | 18.7 |
| *Aythya ferina* | Aves | 22680358 | Vulnerable | Terrestrial | Freshwater | Marine | 16.8 | 14.7 | 6.8 |
| *Barbus euboicus* | Actinopterygii | 2576 | Critically Endangered | Freshwater | 19.6 | 19.5 | 4.5 |
| *Beta nana* | Magnoliopsida | 169912 | Vulnerable | Terrestrial | 40.5 | 29.1 | 39.5 |
| **Scientific Name** | **Class** | **ID** | **Threat Category** | **System** | **Natura 2000 (%)** | **SPAs (%)** | **SCAs (%)** |
| *Bithynia graeca* | Gastropoda | 156023 | Vulnerable | Freshwater | 53.8 | 53.5 | 17.2 |
| *Bithynia kastorias* | Gastropoda | 164879 | Critically Endangered | Freshwater | 10.2 | 6.2 | 6.5 |
| *Bithynia prespensis* | Gastropoda | 171961 | Endangered | Freshwater | 100.0 | 100.0 | 100.0 |
| *Boyeria cretensis* | Insecta | 60307 | Endangered | Terrestrial | Freshwater | 32.2 | 15.1 | 28.4 |
| *Bradyporus macrogaster* | Insecta | 44710554 | Endangered | Terrestrial | 34.5 | 29.7 | 16.6 |
| *Bulgarica mystica* | Gastropoda | 171759 | Vulnerable | Terrestrial | 89.9 | 89.9 | 75.3 |
| *Bupleurum capillare* | Magnoliopsida | 162211 | Vulnerable | Terrestrial | 48.1 | 46.0 | 36.5 |
| *Bupleurum kakiskalae* | Magnoliopsida | 61611 | Critically Endangered | Terrestrial | 100.0 | 67.7 | 100.0 |
| *Buprestis splendens* | Insecta | 3334 | Endangered | Terrestrial | 26.8 | 19.7 | 15.1 |
| *Callitriche pulchra* | Magnoliopsida | 164444 | Critically Endangered | Freshwater | 60.3 | 30.1 | 51.8 |
| *Carinigera albicosta* | Gastropoda | 75780934 | Vulnerable | Terrestrial | 51.6 | 51.6 | 51.6 |
| *Carinigera calabacensis* | Gastropoda | 171223 | Vulnerable | Terrestrial | 63.5 | 18.2 | 63.2 |
| *Carinigera leucorhaphe* | Gastropoda | 171299 | Vulnerable | Terrestrial | 0.2 | 0.0 | 0.2 |
| *Carinigera liebegottae* | Gastropoda | 171046 | Vulnerable | Terrestrial | 100.0 | 100.0 | 100.0 |
| *Carinigera lophauchena* | Gastropoda | 171110 | Endangered | Terrestrial | 38.5 | 31.6 | 25.8 |
| *Carinigera pharsalica* | Gastropoda | 170996 | Endangered | Terrestrial | 81.3 | 81.3 | 0.0 |
| *Carinigera superba* | Gastropoda | 171003 | Vulnerable | Terrestrial | 34.6 | 34.5 | 3.6 |
| *Carinigera tantilla* | Gastropoda | 170978 | Vulnerable | Terrestrial | 100.0 | 100.0 | 0.0 |
| *Carinigera torifera* | Gastropoda | 171546 | Vulnerable | Terrestrial | 100.0 | 89.8 | 100.0 |
| **Scientific Name** | **Class** | **ID** | **Threat Category** | **System** | **Natura 2000 (%)** | **SPAs (%)** | **SCAs (%)** |
| *Carlina diae* | Magnoliopsida | 165174 | Endangered | Terrestrial | 99.5 | 99.0 | 99.5 |
| *Caspiomyzon hellenicus* | Cephalaspidomorphi | 61198 | Critically Endangered | Freshwater | 23.9 | 21.7 | 11.1 |
| *Centaurea heldreichii* | Magnoliopsida | 162407 | Critically Endangered | Terrestrial | 15.5 | 5.5 | 15.5 |
| *Centaurea kalambakensis* | Magnoliopsida | 162306 | Vulnerable | Terrestrial | 93.9 | 64.7 | 93.0 |
| *Centaurea niederi* | Magnoliopsida | 162288 | Vulnerable | Terrestrial | 31.2 | 26.0 | 27.7 |
| *Centaurea peucedanifolia* | Magnoliopsida | 162109 | Vulnerable | Terrestrial | 100.0 | 0.0 | 100.0 |
| *Centaurea princeps* | Magnoliopsida | 162425 | Endangered | Terrestrial | 19.9 | 0.0 | 19.9 |
| *Cephalanthera cucullata* | Liliopsida | 161912 | Vulnerable | Terrestrial | 64.5 | 42.8 | 62.1 |
| *Chondrostoma prespense* | Actinopterygii | 4792 | Vulnerable | Freshwater | 99.8 | 97.1 | 99.8 |
| *Chorthippus ferdinandi* | Insecta | 69637992 | Endangered | Terrestrial | 25.4 | 14.3 | 19.9 |
| *Chorthippus lacustris* | Insecta | 14870997 | Critically Endangered | Terrestrial | 23.8 | 23.4 | 5.6 |
| *Cicer graecum* | Magnoliopsida | 176608 | Endangered | Terrestrial | 13.1 | 11.5 | 11.0 |
| *Clinidium canaliculatum* | Insecta | 165907 | Vulnerable | Terrestrial | 30.7 | 24.2 | 22.1 |
| *Cobitis arachthosensis* | Actinopterygii | 61290 | Endangered | Freshwater | 30.9 | 29.8 | 15.3 |
| *Cobitis hellenica* | Actinopterygii | 5032 | Endangered | Freshwater | 32.6 | 31.4 | 16.0 |
| *Cobitis meridionalis* | Actinopterygii | 5034 | Vulnerable | Freshwater | 100.0 | 100.0 | 100.0 |
| *Cobitis puncticulata* | Actinopterygii | 61179 | Endangered | Freshwater | 47.2 | 46.8 | 28.4 |
| *Cobitis punctilineata* | Actinopterygii | 60838 | Vulnerable | Freshwater | 17.9 | 14.5 | 11.4 |
| *Cobitis stephanidisi* | Actinopterygii | 5030 | Critically Endangered | Freshwater | 51.2 | 49.7 | 17.6 |
| **Scientific Name** | **Class** | **ID** | **Threat Category** | **System** | **Natura 2000 (%)** | **SPAs (%)** | **SCAs (%)** |
| *Cobitis trichonica* | Actinopterygii | 5038 | Endangered | Freshwater | 27.5 | 18.1 | 14.6 |
| *Codringtonia codringtonii* | Gastropoda | 5056 | Endangered | Terrestrial | 16.1 | 8.6 | 15.8 |
| *Codringtonia elisabethae* | Gastropoda | 189708 | Vulnerable | Terrestrial | 14.0 | 1.9 | 12.2 |
| *Codringtonia eucineta* | Gastropoda | 187367 | Vulnerable | Terrestrial | 19.7 | 13.7 | 14.2 |
| *Codringtonia gittenbergeri* | Gastropoda | 189709 | Vulnerable | Terrestrial | 29.1 | 0.2 | 29.1 |
| *Codringtonia helenae* | Gastropoda | 189710 | Vulnerable | Terrestrial | 11.8 | 0.2 | 11.6 |
| *Codringtonia intusplicata* | Gastropoda | 156906 | Vulnerable | Terrestrial | 17.2 | 9.1 | 14.1 |
| *Codringtonia neocrassa* | Gastropoda | 156924 | Vulnerable | Terrestrial | 33.1 | 31.3 | 17.1 |
| *Codringtonia parnassia* | Gastropoda | 156337 | Vulnerable | Terrestrial | 17.3 | 12.4 | 10.6 |
| *Coenagrion intermedium* | Insecta | 165504 | Vulnerable | Terrestrial | Freshwater | 32.2 | 15.1 | 28.4 |
| *Coenonympha orientalis* | Insecta | 173281 | Vulnerable | Terrestrial | 33.2 | 26.7 | 20.7 |
| *Conocephalus ebneri* | Insecta | 68280851 | Endangered | Terrestrial | 23.2 | 22.9 | 3.5 |
| *Consolida samia* | Magnoliopsida | 61673 | Critically Endangered | Terrestrial | 78.1 | 78.1 | 42.1 |
| *Convolvulus argyrothamnos* | Magnoliopsida | 61677 | Critically Endangered | Terrestrial | 52.4 | 46.7 | 52.4 |
| *Cordulegaster helladica* | Insecta | 59706 | Endangered | Terrestrial | Freshwater | 33.4 | 29.2 | 21.9 |
| *Crepis crocifolia* | Magnoliopsida | 161858 | Endangered | Terrestrial | 92.5 | 92.5 | 90.3 |
| *Crocidura zimmermanni* | Mammalia | 5588 | Endangered | Terrestrial | 94.6 | 38.5 | 93.2 |
| *Dactylorhiza kalopissii* | Liliopsida | 162053 | Endangered | Terrestrial | Freshwater | 27.7 | 20.3 | 20.8 |
| *Daphniola exigua* | Gastropoda | 155918 | Endangered | Freshwater | 54.7 | 53.5 | 23.0 |
| **Scientific Name** | **Class** | **ID** | **Threat Category** | **System** | **Natura 2000 (%)** | **SPAs (%)** | **SCAs (%)** |
| *Daphniola louisi* | Gastropoda | 171934 | Critically Endangered | Freshwater | 14.7 | 14.7 | 14.7 |
| *Dasypoda frieseana* | Insecta | 13322492 | Endangered | Terrestrial | 14.4 | 9.8 | 11.0 |
| *Dermochelys coriacea* | Reptilia | 6494 | Vulnerable | Terrestrial | Marine | 32.7 | 22.3 | 24.8 |
| *Deroceras bistimulatum* | Gastropoda | 170645 | Vulnerable | Terrestrial | 89.7 | 89.7 | 84.8 |
| *Deroceras dewinteri* | Gastropoda | 170659 | Vulnerable | Terrestrial | 42.0 | 20.8 | 42.0 |
| *Deroceras gavdosensis* | Gastropoda | 170662 | Vulnerable | Terrestrial | 100.0 | 43.6 | 100.0 |
| *Deroceras gorgonium* | Gastropoda | 170665 | Vulnerable | Terrestrial | 0.0 | 0.0 | 0.0 |
| *Deroceras halieos* | Gastropoda | 170666 | Vulnerable | Terrestrial | 94.7 | 0.0 | 94.7 |
| *Deroceras karnaniensis* | Gastropoda | 170669 | Vulnerable | Terrestrial | 47.3 | 37.7 | 41.2 |
| *Deroceras kasium* | Gastropoda | 170670 | Vulnerable | Terrestrial | 100.0 | 83.9 | 100.0 |
| *Deroceras kythirensis* | Gastropoda | 170674 | Vulnerable | Terrestrial | 18.6 | 18.6 | 0.0 |
| *Deroceras minoicum* | Gastropoda | 170683 | Vulnerable | Terrestrial | 100.0 | 0.0 | 100.0 |
| *Deroceras neuteboomi* | Gastropoda | 170685 | Vulnerable | Terrestrial | 49.1 | 32.7 | 49.1 |
| *Deroceras nyphoni* | Gastropoda | 170687 | Vulnerable | Terrestrial | 0.1 | 0.0 | 0.1 |
| *Dianella thiesseana* | Gastropoda | 155578 | Critically Endangered | Freshwater | 20.0 | 8.6 | 16.5 |
| *Dinaromys bogdanovi* | Mammalia | 6607 | Vulnerable | Terrestrial | 41.1 | 27.5 | 41.1 |
| *Dolichopoda calidnae* | Insecta | 70613415 | Vulnerable | Terrestrial | 0.0 | 0.0 | 0.0 |
| *Dolichopoda cassagnaui* | Insecta | 68313777 | Vulnerable | Terrestrial | 42.4 | 42.0 | 26.2 |
| *Dolichopoda dalensi* | Insecta | 17046304 | Vulnerable | Terrestrial | 32.8 | 31.4 | 1.6 |
| **Scientific Name** | **Class** | **ID** | **Threat Category** | **System** | **Natura 2000 (%)** | **SPAs (%)** | **SCAs (%)** |
| *Dolichopoda gasparoi* | Insecta | 17046307 | Vulnerable | Terrestrial | 3.6 | 0.0 | 3.6 |
| *Dolichopoda giulianae* | Insecta | 70613694 | Vulnerable | Terrestrial | 7.5 | 0.2 | 7.5 |
| *Dolichopoda graeca* | Insecta | 68314157 | Vulnerable | Terrestrial | 82.9 | 82.8 | 23.8 |
| *Dolichopoda ithakii* | Insecta | 17046317 | Vulnerable | Terrestrial | 0.1 | 0.0 | 0.1 |
| *Dolichopoda kalithea* | Insecta | 70613726 | Vulnerable | Terrestrial | 30.1 | 19.2 | 22.6 |
| *Dolichopoda matsakisi* | Insecta | 68314461 | Vulnerable | Terrestrial | 32.9 | 29.6 | 25.5 |
| *Dolichopoda naxia* | Insecta | 68314517 | Vulnerable | Terrestrial | 35.8 | 27.9 | 16.6 |
| *Dolichopoda pavesii* | Insecta | 17046327 | Vulnerable | Terrestrial | 29.5 | 29.4 | 7.0 |
| *Dolichopoda petrochilosi* | Insecta | 68314680 | Vulnerable | Terrestrial | 32.4 | 32.3 | 31.7 |
| *Dolichopoda saraolacosi* | Insecta | 90854150 | Vulnerable | Terrestrial | 19.6 | 19.6 | 19.6 |
| *Dolichopoda thasosensis* | Insecta | 68314976 | Vulnerable | Terrestrial | 36.4 | 36.3 | 0.1 |
| *Doraegopis boeoticus* | Gastropoda | 171117 | Endangered | Terrestrial | 0.0 | 0.0 | 0.0 |
| *Doraegopis carinatus* | Gastropoda | 171054 | Vulnerable | Terrestrial | 12.0 | 0.0 | 12.0 |
| *Doraegopis parnonicus* | Gastropoda | 171645 | Vulnerable | Terrestrial | 99.6 | 0.0 | 99.6 |
| *Doraegopis subaii* | Gastropoda | 171373 | Vulnerable | Terrestrial | 56.8 | 56.8 | 30.0 |
| *Dreissena blanci* | Bivalvia | 197088 | Vulnerable | Freshwater | 31.3 | 23.7 | 17.8 |
| *Economidichthys trichonis* | Actinopterygii | 7021 | Endangered | Freshwater | 57.2 | 11.3 | 55.4 |
| *Enoplium doderoi* | Insecta | 47260954 | Vulnerable | Terrestrial | 17.5 | 0.7 | 17.5 |
| *Epipactis cretica* | Liliopsida | 57478022 | Endangered | Terrestrial | 87.8 | 31.6 | 86.6 |
| **Scientific Name** | **Class** | **ID** | **Threat Category** | **System** | **Natura 2000 (%)** | **SPAs (%)** | **SCAs (%)** |
| *Epipactis greuteri* | Liliopsida | 176023 | Endangered | Terrestrial | 32.8 | 28.3 | 20.6 |
| *Epipactis olympica* | Liliopsida | 13164137 | Endangered | Terrestrial | 68.2 | 68.2 | 68.2 |
| *Eupholidoptera annamariae* | Insecta | 45463331 | Vulnerable | Terrestrial | 21.6 | 18.6 | 3.0 |
| *Eupholidoptera astyla* | Insecta | 45463340 | Endangered | Terrestrial | 51.9 | 25.8 | 49.9 |
| *Eupholidoptera cretica* | Insecta | 45463437 | Vulnerable | Terrestrial | 99.9 | 42.6 | 99.9 |
| *Eupholidoptera feri* | Insecta | 45463463 | Critically Endangered | Terrestrial | 52.2 | 16.8 | 47.6 |
| *Eupholidoptera forcipata* | Insecta | 45463212 | Vulnerable | Terrestrial | 92.2 | 56.8 | 92.2 |
| *Eupholidoptera gemellata* | Insecta | 44711767 | Vulnerable | Terrestrial | 62.6 | 30.8 | 62.6 |
| *Eupholidoptera giuliae* | Insecta | 45463473 | Vulnerable | Terrestrial | 83.1 | 19.1 | 83.1 |
| *Eupholidoptera icariensis* | Insecta | 45463223 | Vulnerable | Terrestrial | 41.9 | 28.9 | 19.7 |
| *Eupholidoptera jacquelinae* | Insecta | 45463233 | Vulnerable | Terrestrial | 100.0 | 40.4 | 100.0 |
| *Eupholidoptera latens* | Insecta | 45463493 | Vulnerable | Terrestrial | 61.3 | 26.7 | 61.3 |
| *Eupholidoptera leucasi* | Insecta | 45462525 | Vulnerable | Terrestrial | 5.2 | 0.8 | 5.2 |
| *Eupholidoptera mariannae* | Insecta | 45463502 | Vulnerable | Terrestrial | 39.5 | 25.6 | 37.6 |
| *Eupholidoptera pallipes* | Insecta | 44711866 | Vulnerable | Terrestrial | 84.8 | 18.7 | 84.8 |
| *Eupholidoptera spinigera* | Insecta | 45463281 | Endangered | Terrestrial | 19.0 | 19.0 | 0.0 |
| *Fritillaria conica* | Liliopsida | 161962 | Endangered | Terrestrial | 20.0 | 1.2 | 20.0 |
| *Fritillaria drenovskii* | Liliopsida | 161845 | Vulnerable | Terrestrial | 28.8 | 21.3 | 18.2 |
| *Fritillaria epirotica* | Liliopsida | 165171 | Endangered | Terrestrial | 50.8 | 27.9 | 42.2 |
| **Scientific Name** | **Class** | **ID** | **Threat Category** | **System** | **Natura 2000 (%)** | **SPAs (%)** | **SCAs (%)** |
| *Fritillaria euboeica* | Liliopsida | 165253 | Vulnerable | Terrestrial | 17.4 | 17.4 | 0.9 |
| *Fritillaria obliqua* | Liliopsida | 162277 | Endangered | Terrestrial | 45.6 | 1.9 | 44.4 |
| *Gagea omalensis* | Liliopsida | 89799806 | Vulnerable | Terrestrial | 100.0 | 5.3 | 100.0 |
| *Galanthus ikariae* | Liliopsida | 164898 | Vulnerable | Terrestrial | 35.5 | 30.2 | 19.8 |
| *Galanthus peshmenii* | Liliopsida | 164899 | Vulnerable | Terrestrial | 96.1 | 0.0 | 96.1 |
| *Galanthus reginae-olgae* | Liliopsida | 164901 | Vulnerable | Terrestrial | 21.7 | 14.6 | 15.4 |
| *Globularia stygia* | Magnoliopsida | 161884 | Vulnerable | Terrestrial | 46.0 | 40.9 | 41.5 |
| *Glyphanus obtusus* | Insecta | 44698010 | Endangered | Terrestrial | 12.5 | 8.8 | 9.4 |
| *Gobio feraeensis* | Actinopterygii | 135515 | Vulnerable | Freshwater | 26.3 | 23.3 | 13.4 |
| *Graecoanatolica macedonica* | Gastropoda | 41027 | Extinct | Freshwater | 99.3 | 99.3 | 20.6 |
| *Graecoanatolica vegorriticola* | Gastropoda | 155522 | Critically Endangered | Freshwater | 18.4 | 12.4 | 11.2 |
| *Graecophaedusa sperrlei* | Gastropoda | 171165 | Vulnerable | Terrestrial | 96.9 | 96.9 | 74.4 |
| *Graecorientalia vrissiana* | Gastropoda | 155969 | Critically Endangered | Freshwater | 33.6 | 32.4 | 22.0 |
| *Gyralina epeirotica* | Gastropoda | 171774 | Vulnerable | Terrestrial | 100.0 | 0.0 | 100.0 |
| *Gyralina ermonae* | Gastropoda | 170836 | Vulnerable | Terrestrial | 6.9 | 6.9 | 0.0 |
| *Gyralina formosa* | Gastropoda | 171467 | Vulnerable | Terrestrial | 100.0 | 100.0 | 0.0 |
| *Gyralina hausdorfi* | Gastropoda | 171461 | Vulnerable | Terrestrial | 3.6 | 0.0 | 3.6 |
| *Gyralina orientalis* | Gastropoda | 76025968 | Vulnerable | Terrestrial | 50.5 | 50.5 | 0.0 |
| *Gyralina pageti* | Gastropoda | 171093 | Vulnerable | Terrestrial | 0.0 | 0.0 | 0.0 |
| **Scientific Name** | **Class** | **ID** | **Threat Category** | **System** | **Natura 2000 (%)** | **SPAs (%)** | **SCAs (%)** |
| *Gyralina riedeli* | Gastropoda | 76025980 | Vulnerable | Terrestrial | 92.6 | 92.6 | 84.6 |
| *Gyralina tsatsae* | Gastropoda | 171365 | Vulnerable | Terrestrial | 0.0 | 0.0 | 0.0 |
| *Gyralina velasensis* | Gastropoda | 171706 | Vulnerable | Terrestrial | 0.0 | 0.0 | 0.0 |
| *Gyraulus stankovici* | Gastropoda | 155729 | Endangered | Freshwater | 100.0 | 100.0 | 100.0 |
| *Hauffenia edlingeri* | Gastropoda | 164853 | Critically Endangered | Freshwater | 11.4 | 8.8 | 9.1 |
| *Heleobia tritonum* | Gastropoda | 155799 | Critically Endangered | Freshwater | 16.9 | 13.7 | 10.9 |
| *Helicodonta wilhelminae* | Gastropoda | 156846 | Endangered | Terrestrial | 80.3 | 0.0 | 80.3 |
| *Helix godetiana* | Gastropoda | 9844 | Endangered | Terrestrial | 35.4 | 23.1 | 25.6 |
| *Helix valentini* | Gastropoda | 156533 | Endangered | Terrestrial | 4.0 | 4.0 | 0.0 |
| *Hipparchia christenseni* | Insecta | 173305 | Endangered | Terrestrial | 41.5 | 13.4 | 41.5 |
| *Horstrissea dolinicola* | Magnoliopsida | 61613 | Critically Endangered | Terrestrial | 100.0 | 71.2 | 100.0 |
| *Iberis runemarkii* | Magnoliopsida | 195483 | Vulnerable | Terrestrial | 29.2 | 0.0 | 29.2 |
| *Idyla liebegottae* | Gastropoda | 171070 | Vulnerable | Terrestrial | 81.4 | 81.4 | 73.6 |
| *Idyla pelobsoleta* | Gastropoda | 171668 | Vulnerable | Terrestrial | 23.3 | 14.9 | 8.5 |
| *Iglica sidariensis* | Gastropoda | 155592 | Vulnerable | Freshwater | 10.3 | 3.9 | 8.5 |
| *Iglica wolfischeri* | Gastropoda | 164821 | Critically Endangered | Freshwater | 16.6 | 16.3 | 8.3 |
| *Islamia epirana* | Gastropoda | 155748 | Vulnerable | Freshwater | 23.7 | 21.6 | 9.4 |
| *Islamia trichoniana* | Gastropoda | 155523 | Critically Endangered | Freshwater | 19.5 | 8.4 | 16.0 |
| *Isoetes haussknechtii* | Lycopodiopsida | 101883407 | Endangered | Terrestrial | Freshwater | 22.3 | 6.0 | 20.4 |
| **Scientific Name** | **Class** | **ID** | **Threat Category** | **System** | **Natura 2000 (%)** | **SPAs (%)** | **SCAs (%)** |
| *Isophya hospodar* | Insecta | 64866649 | Endangered | Terrestrial | 53.9 | 53.7 | 20.3 |
| *Isotomus jarmilae* | Insecta | 157864 | Endangered | Terrestrial | 54.6 | 12.0 | 51.5 |
| *Knipowitschia milleri* | Actinopterygii | 11029 | Critically Endangered | Freshwater | 11.1 | 8.7 | 5.4 |
| *Knipowitschia thessala* | Actinopterygii | 11027 | Endangered | Freshwater | 41.6 | 36.6 | 23.5 |
| *Ladigesocypris ghigii* | Actinopterygii | 11133 | Vulnerable | Freshwater | 35.8 | 22.9 | 23.9 |
| *Lasioglossum breviventre* | Insecta | 19199413 | Endangered | Terrestrial | 28.5 | 23.9 | 15.6 |
| *Limax hemmeni* | Gastropoda | 171778 | Vulnerable | Terrestrial | 0.0 | 0.0 | 0.0 |
| *Lindbergia beroni* | Gastropoda | 170872 | Critically Endangered | Terrestrial | 100.0 | 0.0 | 100.0 |
| *Lindbergia gittenbergeri* | Gastropoda | 171111 | Critically Endangered | Terrestrial | 0.0 | 0.0 | 0.0 |
| *Lindbergia pageti* | Gastropoda | 171221 | Vulnerable | Terrestrial | 0.6 | 0.0 | 0.6 |
| *Lindbergia pinteri* | Gastropoda | 171034 | Vulnerable | Terrestrial | 0.0 | 0.0 | 0.0 |
| *Lindbergia spiliaenymphis* | Gastropoda | 171492 | Vulnerable | Terrestrial | 0.0 | 0.0 | 0.0 |
| *Lindbergia stylokamarae* | Gastropoda | 170899 | Vulnerable | Terrestrial | 100.0 | 83.9 | 100.0 |
| *Liquidambar orientalis* | Magnoliopsida | 62556 | Endangered | Terrestrial | Freshwater | 0.0 | 0.0 | 0.0 |
| *Luciobarbus graecus* | Actinopterygii | 60805 | Endangered | Freshwater | 22.1 | 16.1 | 16.0 |
| *Lycaena ottomana* | Insecta | 39486 | Vulnerable | Terrestrial | 28.8 | 23.8 | 16.3 |
| *Lyciasalamandra helverseni* | Amphibia | 61918 | Vulnerable | Terrestrial | 54.3 | 29.2 | 54.3 |
| *Lyciasalamandra luschani* | Amphibia | 41241 | Vulnerable | Terrestrial | 99.9 | 0.0 | 99.9 |
| *Macedonica guicciardii* | Gastropoda | 171216 | Vulnerable | Terrestrial | 95.2 | 89.9 | 93.1 |
| **Scientific Name** | **Class** | **ID** | **Threat Category** | **System** | **Natura 2000 (%)** | **SPAs (%)** | **SCAs (%)** |
| *Macrovipera schweizeri* | Reptilia | 12654 | Endangered | Terrestrial | 43.9 | 28.4 | 37.1 |
| *Maniola halicarnassus* | Insecta | 174425 | Endangered | Terrestrial | 100.0 | 99.9 | 82.4 |
| *Mastus amenazada* | Gastropoda | 156776 | Vulnerable | Terrestrial | 100.0 | 100.0 | 100.0 |
| *Mastus claudia* | Gastropoda | 157066 | Vulnerable | Terrestrial | 100.0 | 34.6 | 100.0 |
| *Mediterranea amaltheae* | Gastropoda | 15771 | Critically Endangered | Terrestrial | 100.0 | 0.0 | 100.0 |
| *Mediterranea pieperi* | Gastropoda | 171242 | Vulnerable | Terrestrial | 99.0 | 28.1 | 99.0 |
| *Mediterranea pygmaeus* | Gastropoda | 170937 | Vulnerable | Terrestrial | 30.2 | 19.2 | 22.7 |
| *Metafruticicola crassicosta* | Gastropoda | 76032731 | Vulnerable | Terrestrial | 92.8 | 92.8 | 0.0 |
| *Metafruticicola pieperi* | Gastropoda | 76032926 | Vulnerable | Terrestrial | 0.0 | 0.0 | 0.0 |
| *Minuartia dirphya* | Magnoliopsida | 61636 | Critically Endangered | Terrestrial | 100.0 | 100.0 | 22.3 |
| *Monachus monachus* | Mammalia | 13653 | Endangered | Terrestrial | Marine | 41.3 | 28.0 | 34.2 |
| *Montana macedonica* | Insecta | 68440028 | Vulnerable | Terrestrial | 42.9 | 37.8 | 27.1 |
| *Myomimus roachi* | Mammalia | 14087 | Vulnerable | Terrestrial | 25.5 | 25.1 | 0.4 |
| *Myotis capaccinii* | Mammalia | 14126 | Vulnerable | Terrestrial | 26.8 | 20.6 | 16.3 |
| *Nyctalus lasiopterus* | Mammalia | 14918 | Vulnerable | Terrestrial | 26.7 | 21.1 | 14.4 |
| *Ophrys argolica* | Liliopsida | 162112 | Vulnerable | Terrestrial | 17.4 | 10.3 | 14.2 |
| *Orchamus kaltenbachi* | Insecta | 17046338 | Endangered | Terrestrial | 41.5 | 13.5 | 41.5 |
| *Orchamus raulinii* | Insecta | 68444850 | Vulnerable | Terrestrial | 31.8 | 14.8 | 27.9 |
| *Orchis sitiaca* | Liliopsida | 175916 | Endangered | Terrestrial | 35.9 | 16.0 | 32.4 |
| **Scientific Name** | **Class** | **ID** | **Threat Category** | **System** | **Natura 2000 (%)** | **SPAs (%)** | **SCAs (%)** |
| *Oropodisma chelmosi* | Insecta | 16084525 | Endangered | Terrestrial | 29.5 | 14.6 | 22.5 |
| *Oropodisma erymanthosi* | Insecta | 16084372 | Vulnerable | Terrestrial | 61.4 | 61.4 | 40.4 |
| *Oropodisma karavica* | Insecta | 16084420 | Endangered | Terrestrial | 16.8 | 16.8 | 9.5 |
| *Oropodisma kyllinii* | Insecta | 16084417 | Vulnerable | Terrestrial | 71.6 | 66.7 | 62.4 |
| *Oropodisma lagrecai* | Insecta | 16084623 | Critically Endangered | Terrestrial | 41.2 | 0.0 | 41.2 |
| *Oropodisma macedonica* | Insecta | 16084459 | Vulnerable | Terrestrial | 52.5 | 46.6 | 37.9 |
| *Oropodisma parnassica* | Insecta | 16084516 | Endangered | Terrestrial | 74.6 | 74.6 | 48.7 |
| *Oropodisma taygetosi* | Insecta | 16084561 | Vulnerable | Terrestrial | 41.0 | 28.0 | 40.6 |
| *Oropodisma tymphrestosi* | Insecta | 16084584 | Endangered | Terrestrial | 59.8 | 52.2 | 52.3 |
| *Oropodisma willemsei* | Insecta | 16084523 | Critically Endangered | Terrestrial | 49.5 | 27.4 | 42.1 |
| *Osmoderma lassallei* | Insecta | 157575 | Endangered | Terrestrial | 43.5 | 42.0 | 19.7 |
| *Ovaliptila kinzelbachi* | Insecta | 69668544 | Vulnerable | Terrestrial | 21.1 | 0.0 | 21.1 |
| *Ovaliptila nana* | Insecta | 69668788 | Vulnerable | Terrestrial | 42.4 | 2.2 | 42.4 |
| *Oxychilus aegopinoides* | Gastropoda | 171100 | Endangered | Terrestrial | 47.6 | 25.8 | 47.4 |
| *Oxynoemacheilus pindus* | Actinopterygii | 61388 | Vulnerable | Freshwater | 41.3 | 39.7 | 22.4 |
| *Paeonia parnassica* | Magnoliopsida | 162095 | Endangered | Terrestrial | 23.0 | 22.2 | 11.8 |
| *Paladilhiopsis neaaugustensis* | Gastropoda | 156183 | Critically Endangered | Freshwater | 46.0 | 38.0 | 27.5 |
| *Paladilhiopsis thessalica* | Gastropoda | 155965 | Vulnerable | Freshwater | 55.2 | 55.2 | 15.3 |
| *Parabythinella graeca* | Gastropoda | 155919 | Critically Endangered | Freshwater | 18.4 | 12.4 | 11.2 |
| **Scientific Name** | **Class** | **ID** | **Threat Category** | **System** | **Natura 2000 (%)** | **SPAs (%)** | **SCAs (%)** |
| *Parabythinella macedonica* | Gastropoda | 155612 | Endangered | Freshwater | 99.8 | 97.1 | 99.8 |
| *Parabythinella malaprespensis* | Gastropoda | 155626 | Critically Endangered | Freshwater | 99.8 | 97.1 | 99.8 |
| *Paranocaracris bulgaricus* | Insecta | 68446564 | Endangered | Terrestrial | 33.3 | 26.3 | 21.5 |
| *Paranocarodes chopardi* | Insecta | 44697976 | Endangered | Terrestrial | 42.5 | 42.3 | 12.2 |
| *Parnassiana chelmos* | Insecta | 68450071 | Endangered | Terrestrial | 41.9 | 36.9 | 28.2 |
| *Parnassiana coracis* | Insecta | 68450152 | Vulnerable | Terrestrial | 85.1 | 82.5 | 75.4 |
| *Parnassiana dirphys* | Insecta | 68450165 | Vulnerable | Terrestrial | 49.4 | 49.4 | 4.5 |
| *Parnassiana fusca* | Insecta | 68450223 | Vulnerable | Terrestrial | 41.0 | 28.0 | 40.6 |
| *Parnassiana gionica* | Insecta | 68450237 | Critically Endangered | Terrestrial | 71.4 | 32.6 | 71.4 |
| *Parnassiana menalon* | Insecta | 68450241 | Critically Endangered | Terrestrial | 40.3 | 0.0 | 40.3 |
| *Parnassiana nigromarginata* | Insecta | 68450251 | Critically Endangered | Terrestrial | 5.2 | 4.4 | 5.1 |
| *Parnassiana panaetolikon* | Insecta | 68450271 | Critically Endangered | Terrestrial | 44.3 | 0.0 | 44.3 |
| *Parnassiana parnassica* | Insecta | 68450303 | Critically Endangered | Terrestrial | 57.6 | 57.1 | 37.0 |
| *Parnassiana parnon* | Insecta | 68450311 | Vulnerable | Terrestrial | 86.4 | 0.0 | 86.4 |
| *Parnassiana tenuis* | Insecta | 68450318 | Vulnerable | Terrestrial | 58.8 | 36.9 | 42.3 |
| *Parnassiana tymphiensis* | Insecta | 68450364 | Endangered | Terrestrial | 50.3 | 43.5 | 35.5 |
| *Parnassiana tymphrestos* | Insecta | 68450372 | Endangered | Terrestrial | 31.2 | 21.9 | 26.4 |
| *Parnassius apollo* | Insecta | 16249 | Vulnerable | Terrestrial | 30.7 | 24.9 | 17.8 |
| *Passer italiae* | Aves | 103819014 | Vulnerable | Terrestrial | Freshwater | 29.8 | 12.4 | 26.4 |
| **Scientific Name** | **Class** | **ID** | **Threat Category** | **System** | **Natura 2000 (%)** | **SPAs (%)** | **SCAs (%)** |
| *Pedostrangalia ariadne* | Insecta | 86807269 | Vulnerable | Terrestrial | 44.7 | 18.7 | 41.3 |
| *Pedostrangalia revestita* | Insecta | 86807246 | Vulnerable | Terrestrial | 15.5 | 7.7 | 12.9 |
| *Pelasgus epiroticus* | Actinopterygii | 61256 | Critically Endangered | Freshwater | 100.0 | 100.0 | 100.0 |
| *Pelasgus laconicus* | Actinopterygii | 61374 | Critically Endangered | Freshwater | 27.7 | 15.4 | 21.8 |
| *Pelasgus prespensis* | Actinopterygii | 61259 | Endangered | Freshwater | 100.0 | 100.0 | 100.0 |
| *Pelophylax cerigensis* | Amphibia | 58567 | Critically Endangered | Terrestrial | Freshwater | 18.3 | 18.3 | 18.3 |
| *Pelophylax cretensis* | Amphibia | 58581 | Endangered | Terrestrial | Freshwater | 16.1 | 8.2 | 13.7 |
| *Pelophylax epeiroticus* | Amphibia | 58592 | Vulnerable | Terrestrial | Freshwater | 16.9 | 13.8 | 9.2 |
| *Peripodisma tymphii* | Insecta | 16084362 | Endangered | Terrestrial | 28.9 | 28.9 | 9.4 |
| *Pholidoptera lucasi* | Insecta | 68451909 | Endangered | Terrestrial | 53.9 | 53.5 | 27.7 |
| *Phoxinus strymonicus* | Actinopterygii | 135718 | Endangered | Freshwater | 17.7 | 15.4 | 10.4 |
| *Pilularia minuta* | Polypodiopsida | 164187 | Endangered | Freshwater | 31.2 | 23.8 | 20.0 |
| *Pisidium maasseni* | Bivalvia | 155655 | Endangered | Freshwater | 100.0 | 100.0 | 100.0 |
| *Planorbis presbensis* | Gastropoda | 156064 | Vulnerable | Freshwater | 99.8 | 97.1 | 99.8 |
| *Platyla peloponnesica* | Gastropoda | 17517 | Vulnerable | Terrestrial | 35.8 | 25.7 | 24.5 |
| *Platypygius crassus* | Insecta | 16084448 | Endangered | Terrestrial | 26.9 | 16.2 | 21.9 |
| *Podarcis cretensis* | Reptilia | 157252 | Endangered | Terrestrial | 40.7 | 14.4 | 37.3 |
| *Podarcis gaigeae* | Reptilia | 61547 | Vulnerable | Terrestrial | 22.2 | 22.2 | 20.8 |
| *Podarcis levendis* | Reptilia | 157290 | Vulnerable | Terrestrial | 100.0 | 100.0 | 100.0 |
| **Scientific Name** | **Class** | **ID** | **Threat Category** | **System** | **Natura 2000 (%)** | **SPAs (%)** | **SCAs (%)** |
| *Podarcis milensis* | Reptilia | 17797 | Vulnerable | Terrestrial | 52.5 | 40.5 | 43.6 |
| *Poecilimon athos* | Insecta | 17181907 | Vulnerable | Terrestrial | 100.0 | 0.0 | 100.0 |
| *Poecilimon ebneri* | Insecta | 45463531 | Endangered | Terrestrial | 23.6 | 17.1 | 17.7 |
| *Poecilimon gracilioides* | Insecta | 17181977 | Endangered | Terrestrial | 49.1 | 38.0 | 26.4 |
| *Poecilimon ikariensis* | Insecta | 17182027 | Vulnerable | Terrestrial | 41.9 | 28.9 | 19.7 |
| *Poecilimon paros* | Insecta | 45466779 | Endangered | Terrestrial | 22.1 | 17.3 | 9.8 |
| *Poecilimon pindos* | Insecta | 45466678 | Endangered | Terrestrial | 60.5 | 49.9 | 45.6 |
| *Poecilimon soulion* | Insecta | 45466695 | Endangered | Terrestrial | 12.7 | 4.4 | 9.4 |
| *Polygala helenae* | Magnoliopsida | 61668 | Critically Endangered | Terrestrial | 0.0 | 0.0 | 0.0 |
| *Polyommatus orphicus* | Insecta | 173271 | Vulnerable | Terrestrial | 99.0 | 98.7 | 39.6 |
| *Polysarcus scutatus* | Insecta | 44712223 | Endangered | Terrestrial | 55.9 | 37.3 | 40.1 |
| *Prespolitorea malaprespensis* | Gastropoda | 155607 | Critically Endangered | Freshwater | 99.8 | 97.1 | 99.8 |
| *Prespolitorea valvataeformis* | Gastropoda | 155739 | Critically Endangered | Freshwater | 99.8 | 97.1 | 99.8 |
| *Prionotropis willemsorum* | Insecta | 87999248 | Endangered | Terrestrial | 57.2 | 57.2 | 47.0 |
| *Prospero depressum* | Liliopsida | 15418004 | Vulnerable | Terrestrial | 100.0 | 29.7 | 100.0 |
| *Prospero minimum* | Liliopsida | 15418064 | Vulnerable | Terrestrial | 78.0 | 0.0 | 78.0 |
| *Prospero talosii* | Liliopsida | 15418079 | Critically Endangered | Terrestrial | 99.1 | 99.1 | 99.1 |
| *Pseudamnicola chia* | Gastropoda | 155584 | Vulnerable | Freshwater | 41.9 | 36.0 | 33.8 |
| *Pseudamnicola pieperi* | Gastropoda | 155802 | Vulnerable | Freshwater | 55.0 | 30.7 | 55.0 |
| **Scientific Name** | **Class** | **ID** | **Threat Category** | **System** | **Natura 2000 (%)** | **SPAs (%)** | **SCAs (%)** |
| *Pseudobithynia ambrakis* | Gastropoda | 195351 | Vulnerable | Freshwater | 85.5 | 83.9 | 85.5 |
| *Pseudobithynia euboeensis* | Gastropoda | 195005 | Critically Endangered | Freshwater | 19.6 | 19.5 | 4.5 |
| *Pseudobithynia falniowskii* | Gastropoda | 171962 | Critically Endangered | Freshwater | 19.5 | 8.4 | 16.0 |
| *Pseudobithynia panetolis* | Gastropoda | 164885 | Critically Endangered | Freshwater | 20.0 | 8.6 | 16.5 |
| *Pseudobithynia trichonis* | Gastropoda | 164838 | Endangered | Freshwater | 20.0 | 8.6 | 16.5 |
| *Pseudochazara amymone* | Insecta | 173204 | Endangered | Terrestrial | 22.2 | 22.2 | 6.9 |
| *Pseudochazara orestes* | Insecta | 173302 | Vulnerable | Terrestrial | 31.7 | 13.9 | 28.0 |
| *Pseudoislamia balcanica* | Gastropoda | 155933 | Critically Endangered | Freshwater | 20.0 | 8.6 | 16.5 |
| *Pseudomogoplistes byzantius* | Insecta | 68460149 | Endangered | Terrestrial | 36.4 | 36.3 | 0.1 |
| *Pseudosphegesthes bergeri* | Insecta | 157538 | Endangered | Terrestrial | 89.1 | 10.1 | 88.7 |
| *Puffinus yelkouan* | Aves | 22698230 | Vulnerable | Terrestrial | Marine | 41.3 | 27.9 | 34.1 |
| *Pungitius hellenicus* | Actinopterygii | 18875 | Critically Endangered | Freshwater | 25.1 | 13.8 | 17.8 |
| *Pyrgohydrobia prespaensis* | Gastropoda | 156188 | Endangered | Freshwater | 100.0 | 100.0 | 100.0 |
| *Pyrrhosoma elisabethae* | Insecta | 60274 | Critically Endangered | Terrestrial | Freshwater | 19.2 | 14.2 | 11.9 |
| *Radix pinteri* | Gastropoda | 155759 | Endangered | Freshwater | 100.0 | 100.0 | 100.0 |
| *Rhacocleis crypta* | Insecta | 44698051 | Vulnerable | Terrestrial | 42.6 | 42.6 | 0.0 |
| *Rhacocleis derrai* | Insecta | 44698053 | Vulnerable | Terrestrial | 27.3 | 13.8 | 21.3 |
| *Rhacocleis distinguenda* | Insecta | 44698055 | Vulnerable | Terrestrial | 43.0 | 34.8 | 20.5 |
| *Rhacocleis ferdinandi* | Insecta | 44698059 | Vulnerable | Terrestrial | 2.5 | 2.5 | 2.5 |
| **Scientific Name** | **Class** | **ID** | **Threat Category** | **System** | **Natura 2000 (%)** | **SPAs (%)** | **SCAs (%)** |
| *Rhacocleis lithoscirtetes* | Insecta | 44698076 | Vulnerable | Terrestrial | 17.5 | 0.0 | 17.5 |
| *Rhacocleis trilobata* | Insecta | 44698104 | Critically Endangered | Terrestrial | 71.5 | 66.7 | 62.4 |
| *Rhinolophus mehelyi* | Mammalia | 19519 | Vulnerable | Terrestrial | 23.8 | 18.0 | 14.2 |
| *Rutilus panosi* | Actinopterygii | 135630 | Vulnerable | Freshwater | 59.0 | 13.7 | 58.1 |
| *Rutilus prespensis* | Actinopterygii | 61188 | Vulnerable | Freshwater | 100.0 | 100.0 | 100.0 |
| *Rutilus ylikiensis* | Actinopterygii | 19788 | Endangered | Freshwater | 15.7 | 6.5 | 11.9 |
| *Saga gracilis* | Insecta | 86222059 | Vulnerable | Terrestrial | 39.1 | 37.4 | 16.4 |
| *Salaria economidisi* | Actinopterygii | 61353 | Critically Endangered | Freshwater | 100.0 | 0.0 | 100.0 |
| *Salix xanthicola* | Magnoliopsida | 175638 | Vulnerable | Terrestrial | Freshwater | 34.2 | 34.2 | 9.5 |
| *Salmo pelagonicus* | Actinopterygii | 135709 | Vulnerable | Freshwater | 15.4 | 11.5 | 8.9 |
| *Salmo peristericus* | Actinopterygii | 61231 | Endangered | Freshwater | 99.8 | 96.2 | 99.8 |
| *Saponaria jagelii* | Magnoliopsida | 61639 | Critically Endangered | Terrestrial | 99.4 | 0.0 | 99.4 |
| *Scardinius graecus* | Actinopterygii | 19947 | Critically Endangered | Freshwater | 95.9 | 0.0 | 95.9 |
| *Silene holzmannii* | Magnoliopsida | 161910 | Endangered | Terrestrial | 95.3 | 87.1 | 94.1 |
| *Silene orphanidis* | Magnoliopsida | 162290 | Endangered | Terrestrial | 100.0 | 0.0 | 100.0 |
| *Solenanthus albanicus* | Magnoliopsida | 161867 | Endangered | Terrestrial | 78.7 | 78.7 | 50.7 |
| *Somatochlora borisi* | Insecta | 59774 | Vulnerable | Terrestrial | Freshwater | 56.7 | 56.6 | 22.6 |
| *Speleodentorcula beroni* | Gastropoda | 156552 | Vulnerable | Terrestrial | 0.0 | 0.0 | 0.0 |
| *Spermophilus citellus* | Mammalia | 20472 | Vulnerable | Terrestrial | 30.6 | 29.7 | 13.5 |
| **Scientific Name** | **Class** | **ID** | **Threat Category** | **System** | **Natura 2000 (%)** | **SPAs (%)** | **SCAs (%)** |
| *Sphincterochila insularis* | Gastropoda | 171081 | Endangered | Terrestrial | 100.0 | 97.4 | 100.0 |
| *Sphingonotus personatus* | Insecta | 16084535 | Endangered | Terrestrial | 3.9 | 1.3 | 3.7 |
| *Squalius keadicus* | Actinopterygii | 60738 | Endangered | Freshwater | 29.9 | 13.8 | 26.1 |
| *Squalius moreoticus* | Actinopterygii | 135568 | Endangered | Freshwater | 25.9 | 16.1 | 19.7 |
| *Squalius sp. nov. 'Evia'* | Actinopterygii | 135586 | Critically Endangered | Freshwater | 19.6 | 19.5 | 4.5 |
| *Stenobothrus clavatus* | Insecta | 16084627 | Endangered | Terrestrial | 2.4 | 2.4 | 0.0 |
| *Telestes beoticus* | Actinopterygii | 60635 | Endangered | Freshwater | 15.2 | 9.2 | 11.9 |
| *Trichoferus bergeri* | Insecta | 157771 | Critically Endangered | Terrestrial | 14.0 | 3.4 | 14.0 |
| *Tricholoma acerbum* | Agaricomycetes | 76265852 | Vulnerable | Terrestrial | 24.2 | 19.5 | 14.4 |
| *Trichonia trichonica* | Gastropoda | 155560 | Critically Endangered | Freshwater | 53.8 | 53.5 | 17.2 |
| *Trionyx triunguis* | Reptilia | 62256 | Vulnerable | Terrestrial | Freshwater | Marine | 30.8 | 7.1 | 24.8 |
| *Triplax emgei* | Insecta | 157580 | Endangered | Terrestrial | 25.1 | 20.5 | 19.1 |
| *Troglophilus marinae* | Insecta | 68485565 | Critically Endangered | Terrestrial | 10.9 | 0.0 | 10.9 |
| *Tropidophoxinellus spartiaticus* | Actinopterygii | 22346 | Vulnerable | Freshwater | 23.5 | 12.3 | 18.8 |
| *Tsoukatosia argolica* | Gastropoda | 107884970 | Vulnerable | Terrestrial | 0.0 | 0.0 | 0.0 |
| *Tsoukatosia evauemgei* | Gastropoda | 85588054 | Critically Endangered | Terrestrial | 0.0 | 0.0 | 0.0 |
| *Tsoukatosia liae* | Gastropoda | 171561 | Vulnerable | Terrestrial | 35.1 | 0.0 | 35.1 |
| *Tsoukatosia nicoleae* | Gastropoda | 107885596 | Vulnerable | Terrestrial | 28.0 | 0.0 | 28.0 |
| **Scientific Name** | **Class** | **ID** | **Threat Category** | **System** | **Natura 2000 (%)** | **SPAs (%)** | **SCAs (%)** |
| *Turcorientalia hohenackeri* | Gastropoda | 155533 | Vulnerable | Freshwater | 28.6 | 27.5 | 13.1 |
| *Valencia letourneuxi* | Actinopterygii | 22830 | Critically Endangered | Freshwater | 21.1 | 19.3 | 10.8 |
| *Valvata klemmi* | Gastropoda | 155855 | Endangered | Freshwater | 20.0 | 8.6 | 16.5 |
| *Veronica oetaea* | Magnoliopsida | 161938 | Critically Endangered | Terrestrial | Freshwater | 11.4 | 11.2 | 11.4 |
| *Viola athois* | Magnoliopsida | 161871 | Vulnerable | Terrestrial | 80.4 | 40.3 | 80.4 |
| *Vipera graeca* | Reptilia | 53789650 | Endangered | Terrestrial | 39.5 | 32.0 | 24.3 |
| *Vipera ursinii* | Reptilia | 22997 | Vulnerable | Terrestrial | 52.9 | 39.3 | 34.2 |
| *Vitrea megistislavras* | Gastropoda | 85590206 | Vulnerable | Terrestrial | 100.0 | 0.0 | 100.0 |
| *Vitrea pageti* | Gastropoda | 171178 | Vulnerable | Terrestrial | 0.0 | 0.0 | 0.0 |
| *Vitrea pieperiana* | Gastropoda | 171138 | Critically Endangered | Terrestrial | 70.6 | 0.0 | 70.6 |
| *Vitrea pinteri* | Gastropoda | 171710 | Vulnerable | Terrestrial | 98.2 | 97.7 | 98.1 |
| *Vitrea storchi* | Gastropoda | 171432 | Extinct | Terrestrial | 0.0 | 0.0 | 0.0 |
| *Vormela peregusna* | Mammalia | 29680 | Vulnerable | Terrestrial | 48.0 | 47.1 | 18.6 |
| *Wagenitzia lancifolia* | Magnoliopsida | 161881 | Endangered | Terrestrial | 53.5 | 18.8 | 48.3 |
| *Zelkova abelicea* | Magnoliopsida | 30319 | Endangered | Terrestrial | 35.8 | 13.8 | 33.8 |
| *Zonites algirus* | Gastropoda | 171450 | Vulnerable | Terrestrial | 50.6 | 50.6 | 0.0 |
| *Zonites anaphiensis* | Gastropoda | 23213 | Vulnerable | Terrestrial | 22.2 | 8.9 | 21.4 |
| *Zonites astakidae* | Gastropoda | 171304 | Critically Endangered | Terrestrial | 100.0 | 95.6 | 100.0 |
| *Zonites embolium* | Gastropoda | 171211 | Critically Endangered | Terrestrial | 100.0 | 97.5 | 100.0 |
| **Scientific Name** | **Class** | **ID** | **Threat Category** | **System** | **Natura 2000 (%)** | **SPAs (%)** | **SCAs (%)** |
| *Zonites euboeicus* | Gastropoda | 171441 | Endangered | Terrestrial | 88.4 | 88.4 | 15.0 |
| *Zonites graecus* | Gastropoda | 170840 | Endangered | Terrestrial | 18.8 | 15.6 | 18.2 |
| *Zonites invitus* | Gastropoda | 171663 | Critically Endangered | Terrestrial | 100.0 | 89.3 | 100.0 |
| *Zonites kobelti* | Gastropoda | 171280 | Endangered | Terrestrial | 93.5 | 93.5 | 93.4 |
| *Zonites labiosus* | Gastropoda | 170863 | Endangered | Terrestrial | 28.2 | 22.8 | 18.9 |
| *Zonites messenicus* | Gastropoda | 171172 | Endangered | Terrestrial | 2.0 | 1.0 | 2.0 |
| *Zonites nautarum* | Gastropoda | 171766 | Critically Endangered | Terrestrial | 100.0 | 97.5 | 100.0 |
| *Zonites nikariae* | Gastropoda | 171246 | Vulnerable | Terrestrial | 41.9 | 28.9 | 19.6 |
| *Zonites nisyrius* | Gastropoda | 171753 | Vulnerable | Terrestrial | 99.8 | 99.5 | 82.0 |
| *Zonites oertzeni* | Gastropoda | 170928 | Endangered | Terrestrial | 8.5 | 8.5 | 0.0 |
| *Zonites pergranulatus* | Gastropoda | 170844 | Vulnerable | Terrestrial | 33.2 | 25.3 | 19.3 |
| *Zonites santoriniensis* | Gastropoda | 171131 | Extinct | Terrestrial | 10.9 | 0.0 | 10.9 |
| *Zonites sariae* | Gastropoda | 171413 | Vulnerable | Terrestrial | 100.0 | 100.0 | 100.0 |
| *Zonites siphnicus* | Gastropoda | 171588 | Extinct | Terrestrial | 42.4 | 30.4 | 42.4 |

Table S3 Comparison of the percentage (%) of overlap between all classes and comprehensively assessed classes
for all species, per threat category and system. Numbers in brackets represent the number of threatened species.

|  | **Natura 2000** | | **SPAs** | | | **SACs** | | |
| --- | --- | --- | --- | --- | --- | --- | --- | --- |
| **All classes** | **Comp. assessed** | | **All classes** | **Comp. assessed** | | **All classes** | **Comp. assessed** |
| All species | 47.6% (424) | 48.55% (236) | | 33.4% | 36.7% | | 38.1% | 39.2% |
| VU | 47.1% (233) | 47.8% (143) | | 32.2% | 35.8% | | 37.6% | 38.4% |
| EN | 46.5% (116) | 50.0% (45) | | 34.2% | 40.9% | | 37.0% | 40.0% |
| CR | 51.2% (76) | 49.5% (48) | | 36.1% | 35.2% | | 42.6% | 40.8% |
| Terrestrial | 47.7% (331) | 47.6% (159) | | 31.6% | 33.9% | | 38.3% | 38.3% |
| Freshwater | 46.0% (102) | 48.7% (84) | | 38.3% | 40.9% | | 36.4% | 39.1% |

Table S4 Comparison of the percentage (%) of threatened species per administrative region between all classes and
comprehensively assessed classes. Numbers in brackets represent the number of threatened species.

| **Region** | **percentage of threatened species** | |
| --- | --- | --- |
| **All classes** | **Comp. assessed** | |
| Crete | 12.0% (85) | 11.5% (41) | |
| Peloponnese | 9.7% (94) | 10.9% (52) | |
| Western Greece | 9.1% (98) | 10.5% (58) | |
| Central Greece | 9.0% (99) | 8.6% (48) | |
| South Aegean | 7.9% (65) | 9.5% (39) | |
| Epirus | 7.7% (90) | 8.2% (49) | |
| Thessaly | 7.6% (85) | 8.1% (46) | |
| Attica | 7.0% (56) | 9.1% (37) | |
| Western Macedonia | 6.9% (76) | 7.4% (41) | |
| Central Macedonia | 6.2% (75) | 6.8% (41) | |
| Ionian Islands | 6.1% (53) | 7.1% (33) | |
| Eastern Macedonia and Thrace | 5.6% (64) | 6.0% (35) | |
| North Aegean | 4.9% (35) | 5.0% (17) | |


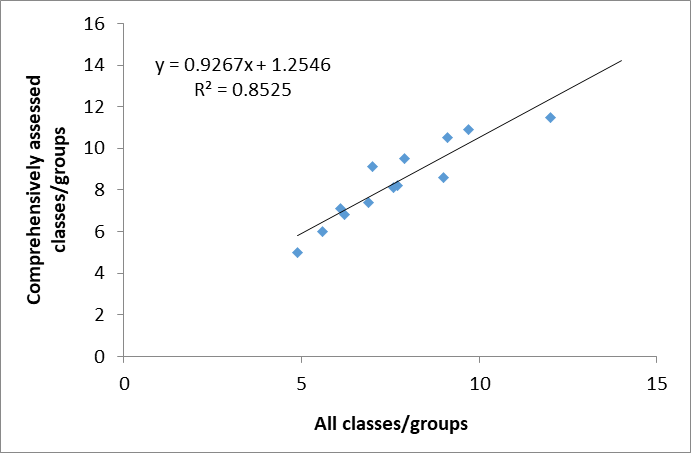


Figure S1 The relationship between all classes and comprehensively assessed classes in regards to the percentage (%) of threatened species per administrative region (see Table S3).

Table S5 Comparison of the mean percentage (%) overlap between threatened
species ranges and the Natura 2000 per region between all classes and
comprehensively assessed classes. Numbers in brackets represent the number
of threatened species.

| **Region** | **overlap with the Natura 2000** | | |
| --- | --- | --- | --- |
| **All classes** | **Comp. assessed** |
| Crete | 62.3% (85) | 59.8% (41) |
| South Aegean | 54.3% (65) | 62.1% (39) |
| Central Macedonia | 50.4% (75) | 56.3% (41) |
| Epirus | 48.8% (90) | 50.8% (49) |
| Western Macedonia | 48.6% (76) | 56.7% (41) |
| Thessaly | 47.0% (85) | 49.7% (46) |
| Eastern Macedonia and Thrace | 41.2% (64) | 43.2% (35) |
| North Aegean | 39.8% (35) | 32.5% (17) |
| Ionian Islands | 36.3% (53) | 46.7% (33) |
| Central Greece | 32.3% (99) | 31.5% (48) |
| Peloponnese | 30.6% (94) | 24.6% (52) |
| Western Greece | 29.4% (98) | 27.9% (58) |
| Attica | 18.6% (56) | 21.7% (37) |


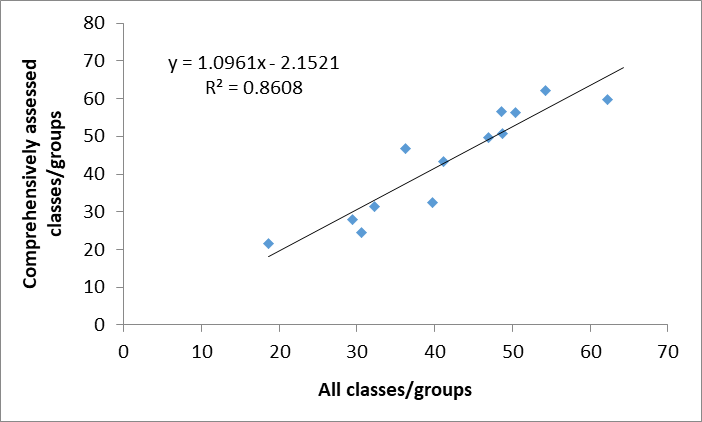


Figure S2 The relationship between all classes and comprehensively assessed classes in regards to the mean percentage (%) overlap between threatened species ranges and the Natura 2000 per region (see Table S4).


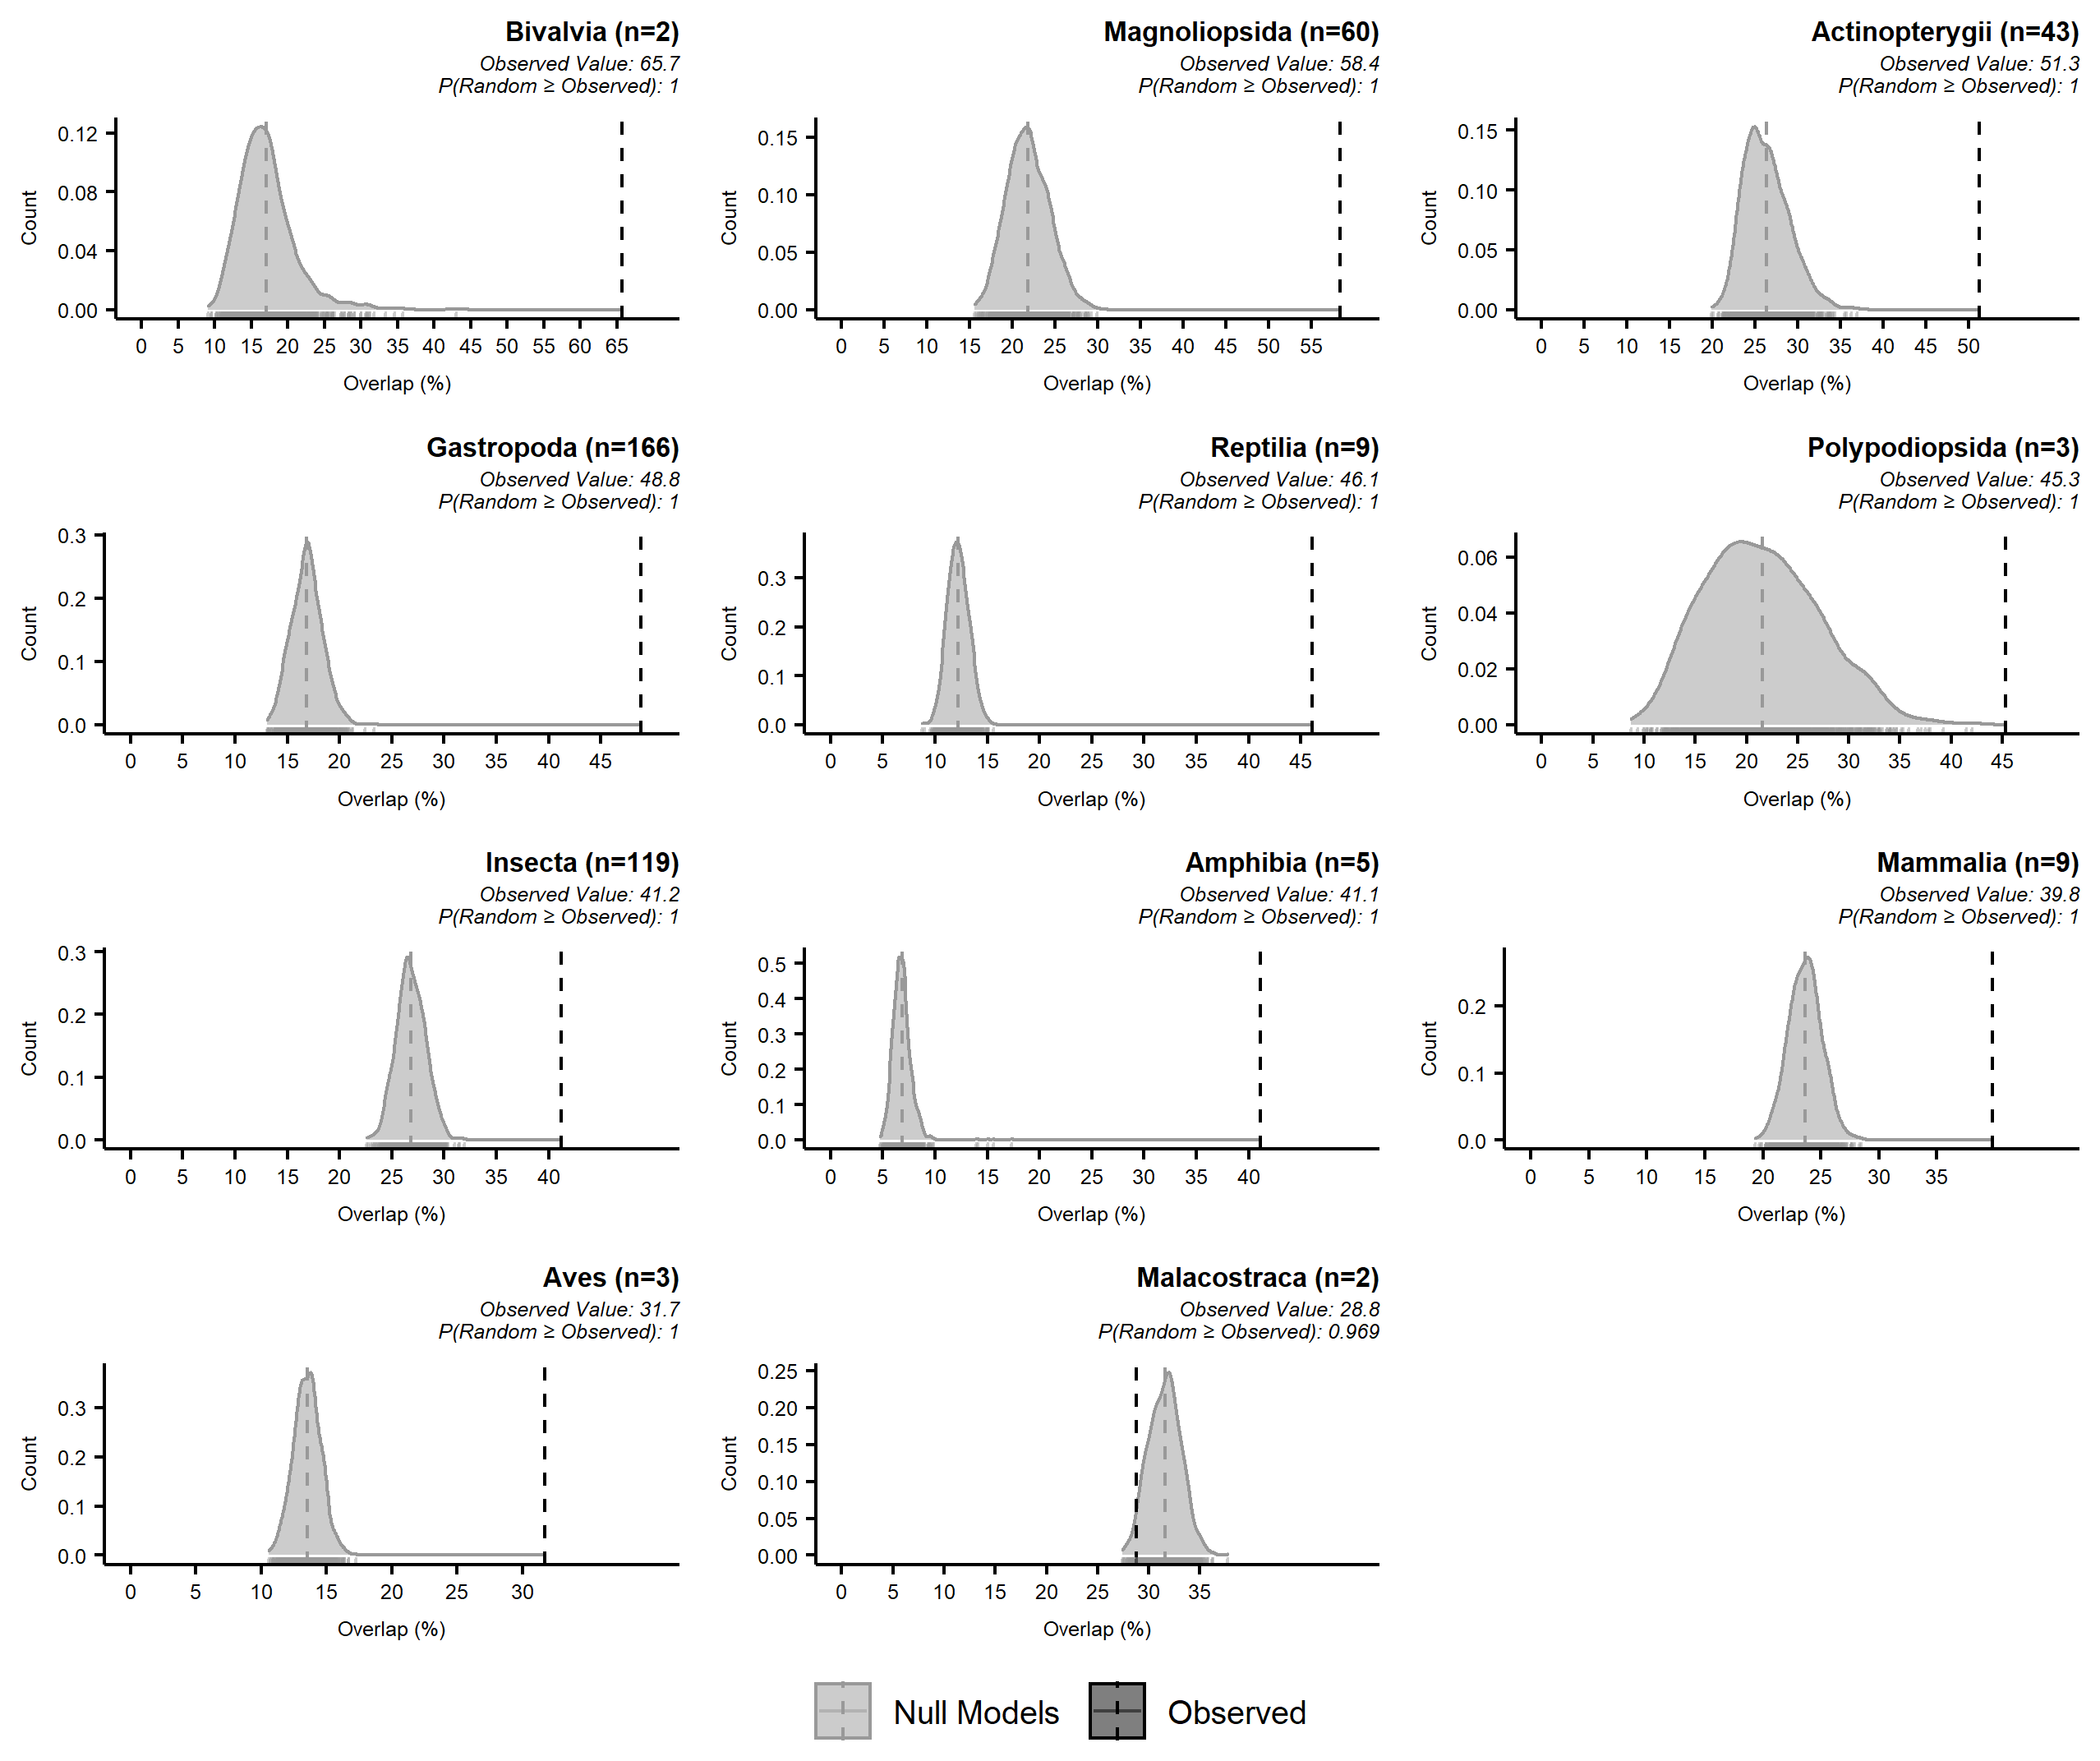


*Figure S3 Comparison of the observed percentage of overlap between the threatened species’ ranges and the Natura 2000 network in Greece (dark grey), to the percentage of overlap obtained by the 999 random networks (light grey) for each class.* *Classes with more than one species were considered (see Table 2). Number in brackets next to the class name represent the number of threatened species used in the analysis.*

Table S6 Percentage (%) of threatened species per class per administrative region in Greece.

| **Class** | **Eastern Macedonia and Thrace** | **Central Macedonia** | **Western Macedonia** | **Epirus** | **Thessaly** | **Ionian Islands** | **Western Greece** | **Central Greece** | **Attica** | **Peloponnese** | **North Aegean** | **South Aegean** | **Crete** |
| --- | --- | --- | --- | --- | --- | --- | --- | --- | --- | --- | --- | --- | --- |
| Actinopterygii | 14.3 | 15.8 | 23.1 | 21.1 | 23.6 | 12.9 | 30.4 | 25.5 | 23.5 | 22.6 | 8.3 | 13.6 | 6.3 |
| Agaricomycetes | 100.0 | 100.0 | 100.0 | 100.0 | 100.0 | 100.0 | 100.0 | 100.0 | 100.0 | 100.0 | 0.0 | 0.0 | 0.0 |
| Amphibia | 0.0 | 0.0 | 0.0 | 7.7 | 0.0 | 8.3 | 7.7 | 7.7 | 0.0 | 8.3 | 0.0 | 37.5 | 25.0 |
| Aves | 4.4 | 3.5 | 2.4 | 3.8 | 2.4 | 3.5 | 2.8 | 2.0 | 2.7 | 2.4 | 1.9 | 2.6 | 3.3 |
| Bivalvia | 0.0 | 0.0 | 20.0 | 10.0 | 25.0 | 30.0 | 14.3 | 14.3 | 0.0 | 14.3 | 0.0 | 0.0 | 0.0 |
| Cephalaspidomorphi | 100.0 | 100.0 | 0.0 | 100.0 | 100.0 | 0.0 | 100.0 | 0.0 | 0.0 | 0.0 | 0.0 | 0.0 | 0.0 |
| Gastropoda | 4.8 | 10.3 | 11.2 | 11.6 | 13.2 | 13.6 | 17.8 | 13.7 | 17.0 | 24.3 | 12.9 | 18.3 | 21.3 |
| Insecta | 11.3 | 9.3 | 12.7 | 17.8 | 13.5 | 11.1 | 17.4 | 20.0 | 10.6 | 19.4 | 10.8 | 14.6 | 29.1 |
| Lycopodiopsida | 0.0 | 50.0 | 50.0 | 50.0 | 66.7 | 0.0 | 0.0 | 50.0 | 0.0 | 50.0 | 50.0 | 0.0 | 0.0 |
| Magnoliopsida | 1.7 | 3.1 | 2.6 | 2.4 | 3.3 | 1.7 | 2.9 | 4.5 | 2.2 | 3.9 | 2.3 | 3.4 | 7.3 |
| Malacostraca | 33.3 | 25.0 | 16.7 | 16.7 | 16.7 | 16.7 | 16.7 | 16.7 | 20.0 | 20.0 | 20.0 | 16.7 | 20.0 |
| Mammalia | 8.8 | 7.4 | 6.6 | 4.5 | 4.3 | 7.5 | 6.8 | 6.1 | 6.1 | 6.0 | 5.9 | 6.3 | 8.6 |
| Polypodiopsida | 11.1 | 10.0 | 12.5 | 0.0 | 14.3 | 0.0 | 0.0 | 12.5 | 20.0 | 0.0 | 12.5 | 14.3 | 28.6 |
| Reptilia | 7.7 | 7.7 | 8.3 | 11.5 | 14.8 | 3.6 | 9.1 | 14.3 | 13.3 | 6.3 | 7.7 | 12.5 | 14.3 |

Table S7 Mean percentage overlap (%) of threatened species ranges with the Natura 2000 network per Class in each administrative region of Greece. NA values represent the absence of threatened species at the region.

| **Class** | **Eastern Macedonia and Thrace** | **Central Macedonia** | **Western Macedonia** | **Epirus** | **Thessaly** | **Ionian Islands** | **Western Greece** | **Central Greece** | **Attica** | **Peloponnese** | **North Aegean** | **South Aegean** | **Crete** |
| --- | --- | --- | --- | --- | --- | --- | --- | --- | --- | --- | --- | --- | --- |
| Actinopterygii | 40.9 | 64.5 | 64.7 | 44.2 | 42.7 | 13.1 | 33.8 | 22.3 | 5.4 | 21.4 | 39.2 | 53.4 | 28.0 |
| Agaricomycetes | 28.5 | 30.7 | 16.2 | 34.9 | 35.1 | 17.6 | 18.0 | 18.2 | 9.3 | 12.6 | NA | NA | NA |
| Amphibia | NA | NA | NA | 22.7 | NA | 4.1 | 12.7 | 84.0 | NA | 42.7 | NA | 57.5 | 16.2 |
| Aves | 32.9 | 36.4 | 8.9 | 20.2 | 68.2 | 34.7 | 39.0 | 13.0 | 17.7 | 41.9 | 49.2 | 52.5 | 41.3 |
| Bivalvia | NA | NA | 100.0 | 54.0 | NA | 94.6 | 20.0 | 4.8 | NA | NA | NA | NA | NA |
| Cephalaspidomorphi | 19.5 | 18.8 | NA | 27.1 | 66.4 | NA | 2.2 | NA | NA | NA | NA | NA | NA |
| Gastropoda | 62.5 | 61.7 | 65.9 | 62.7 | 53.7 | 50.3 | 23.1 | 40.6 | 21.3 | 24.0 | 24.4 | 67.3 | 65.2 |
| Insecta | 43.6 | 38.8 | 25.5 | 46.8 | 41.1 | 9.8 | 33.8 | 34.6 | 17.1 | 35.5 | 35.8 | 32.3 | 55.6 |
| Lycopodiopsida | NA | NA | NA | NA | 9.0 | NA | NA | NA | NA | 3.1 | 38.8 | NA | NA |
| Magnoliopsida | 28.7 | 60.4 | 49.1 | 51.1 | 53.5 | 8.9 | 28.1 | 34.9 | 9.6 | 55.1 | 63.3 | 51.5 | 76.2 |
| Malacostraca | 33.9 | 31.2 | 16.2 | 34.8 | 35.8 | 17.2 | 18.2 | 19.2 | 10.4 | 19.5 | 32.5 | 100.0 | NA |
| Mammalia | 35.4 | 36.3 | 24.5 | 35.3 | 35.7 | 86.0 | 28.3 | 19.3 | 13.4 | 26.8 | 49.5 | 76.2 | 62.7 |
| Polypodiopsida | 51.6 | 57.4 | 97.7 | NA | 39.4 | NA | NA | 16.8 | 15.3 | NA | 41.1 | 35.2 | 52.4 |
| Reptilia | 44.5 | 57.6 | 37.2 | 50.8 | 55.1 | 15.4 | 21.9 | 29.0 | 71.7 | 25.8 | 40.7 | 41.2 | 34.2 |
